# Supplementary material for: An In Vivo Model of Separate M. tuberculosis Phagocytosis by Neutrophils and Macrophages: Gene Expression Profiles in the Parasite and Disease Development in the Mouse Host
Source: MDPI journal article supplement (doi:10.3390/ijms23062961), 2022-03-09
Supplement: s1 [file s1]

**Supplementary Table S1. Oligonucleotides used for qPCR analysis**

| Name        | Sequence                    |
|-------------|-----------------------------|
| Rv3131_qfor | GGG GTA CAA CCG CTT GTT CCC |
| Rv3131_qrev | GGT CTA GGG CAC TGA CCT GC  |
| Rv0440_qfor | CAA GGC GAT GCT GCA GGA TAT |
| Rv0440_qrev | GGT GGT CTC GTC CTT GGT GAC |
| 16S_qfor    | TACGTAGGGTGCGAGCGTTG        |
| 16S-qrev    | CCCGCACGCTCACAGTTAAG        |
| DosR-qfor   | TGTCGCGGTGCTGGATGTC         |
| DosR-qrev   | ATTCCCTTGATGTCTTTGACGAC     |
